# Supplementary material for: Acetate ion addition to and exchange in (1,5-cyclooctadiene)rhodium(i) acetate: relevance for the coagulation of carboxylic acid-functionalized shells of core-crosslinked micelle latexes
Source: Royal Society of Chemistry journal article supplement (doi:10.1039/d3dt02260a), 2023-01-01
Supplement: d3dt02260a1.pdf [file d3dt02260a1.pdf]

**Acetate Ion Addition to and Exchange in (1,5-cyclooctadiene)rhodium(I)  
Acetate: Relevance for the Coagulation of Carboxylic Acid-  
Functionalized Shells of Core-crosslinked Micelle Latexes**

Ambra Maria Fiore, Valentina Petrelli, Christophe Fliedel, Eric Manoury, Piero Mastrorilli\*,  
and Rinaldo Poli\*

**Supporting Information**

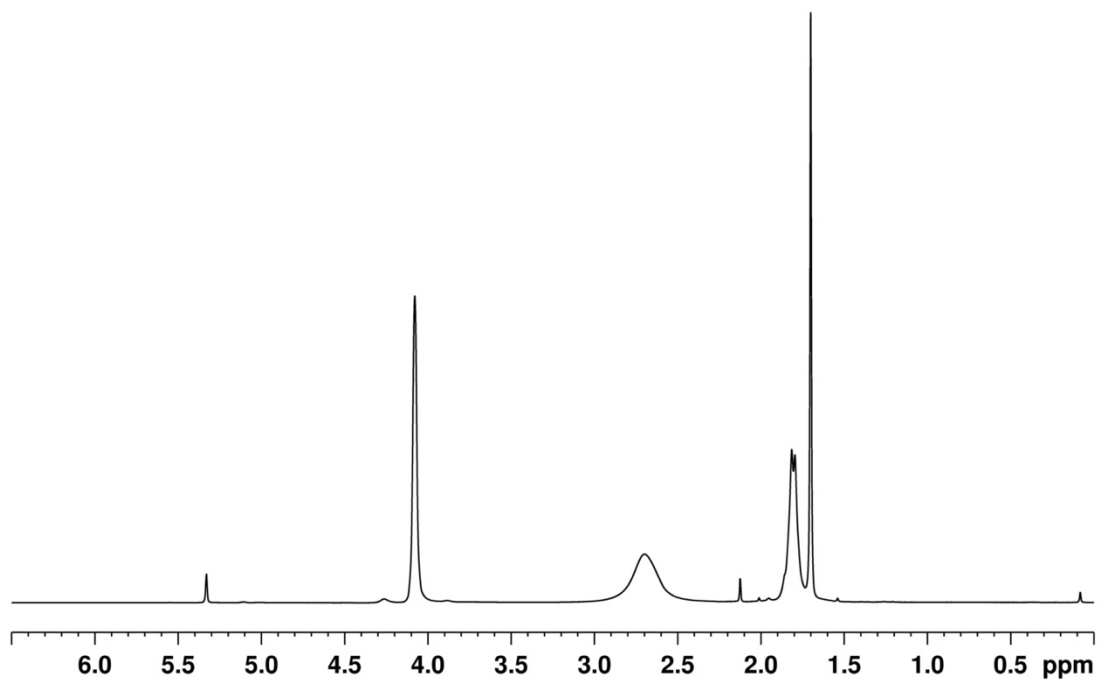

Figure S1.  $^1\text{H}$  NMR spectrum of  $[\text{Rh}(\text{COD})(\mu\text{-OAc})_2]$  ( $\text{CD}_2\text{Cl}_2$ , 400 MHz, 293 K).

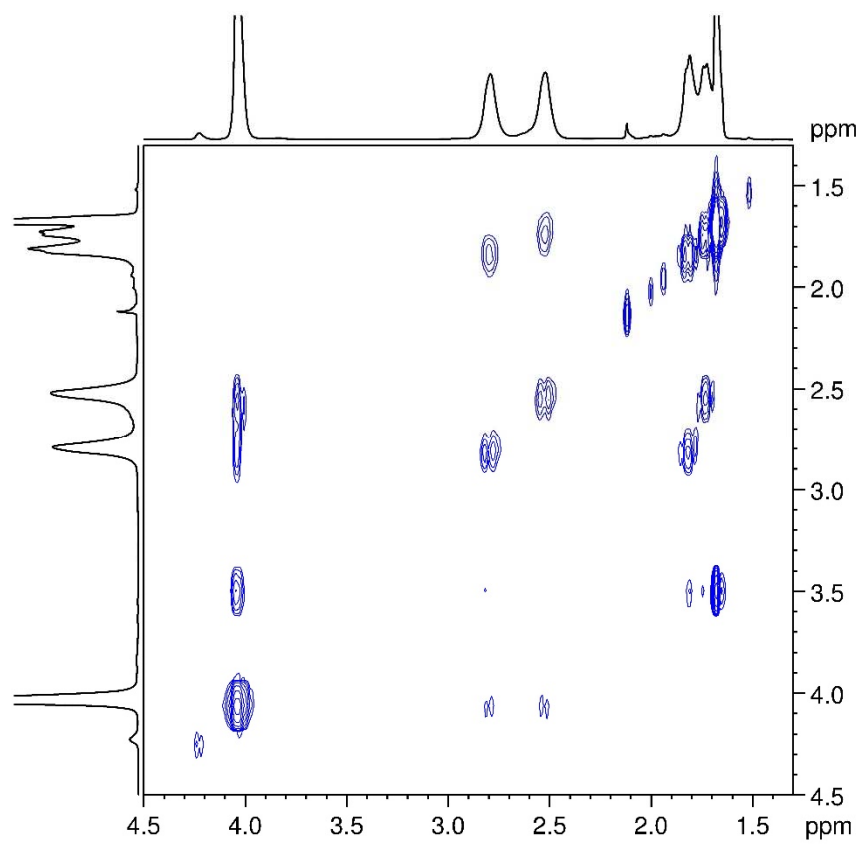

Figure S2.  $^1\text{H}$  COSY spectrum of  $[\text{Rh}(\text{COD})(\mu\text{-OAc})_2]$  ( $\text{CD}_2\text{Cl}_2$ , 400 MHz, 253 K).

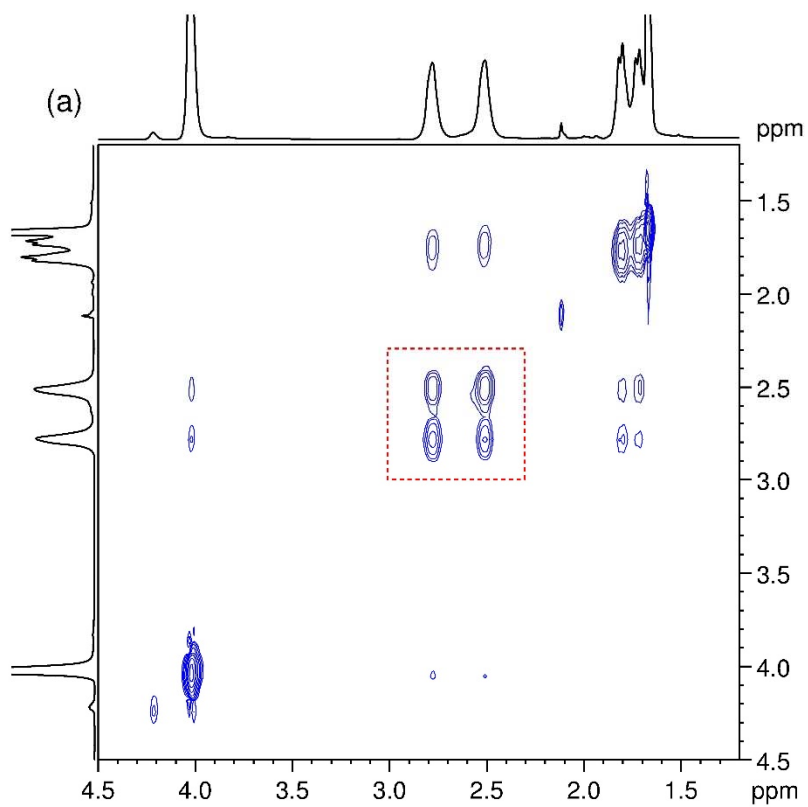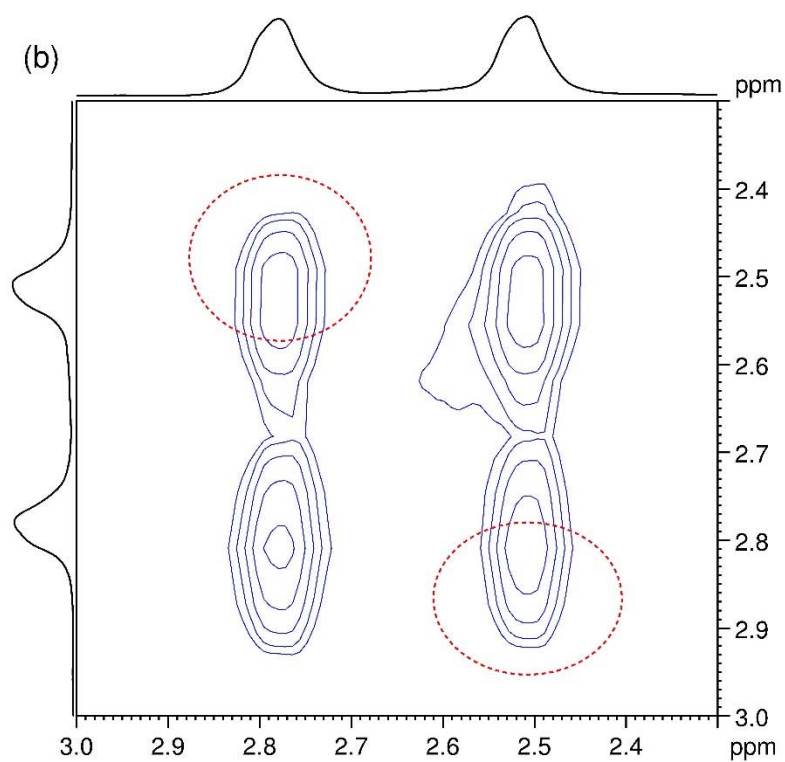

Figure S3. (a) Portion of the  $^1\text{H}$  EXSY spectrum  $[\text{Rh}(\text{COD})(\mu\text{-OAc})_2]$  ( $\text{CD}_2\text{Cl}_2$ , 400 MHz, 233 K). (b) Expansions of selected areas.

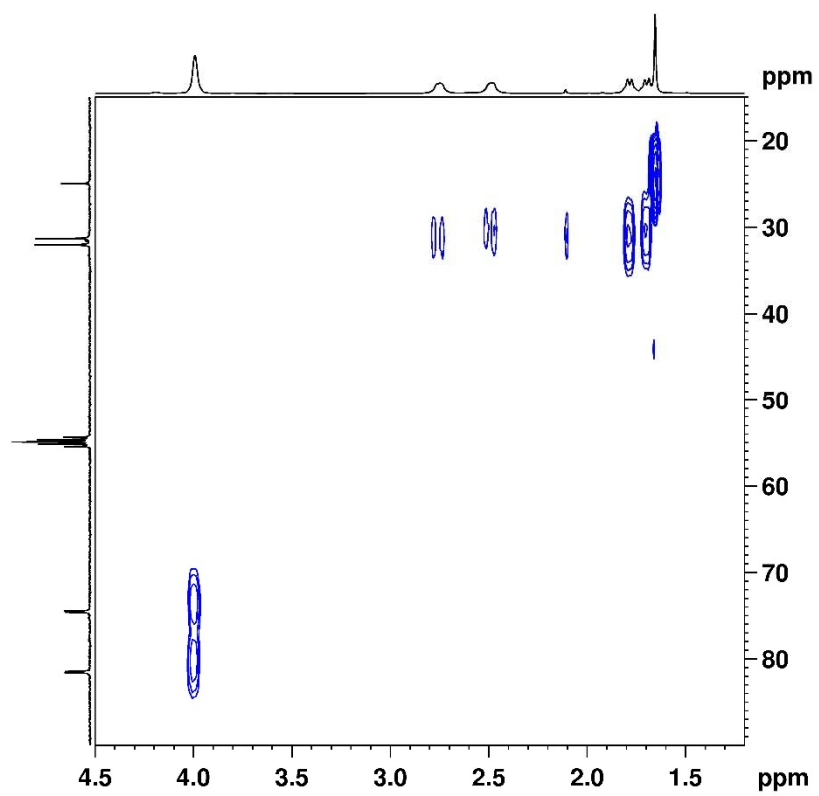

Figure S4.  $^1\text{H}$ - $^{13}\text{C}$  HMQC spectrum of  $[\text{Rh}(\text{COD})(\mu\text{-OAc})_2]$  ( $\text{CD}_2\text{Cl}_2$ , 223 K).

Table S1. Comparison of observed and DFT calculated structure for the most relevant bond distances and angles.

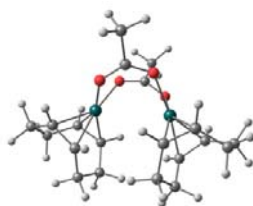

| Parameter     | Observed <sup>a</sup>                                                                | Calculated                                                   | Parameter                            | Observed <sup>a</sup>                | Calculated                           |
|---------------|--------------------------------------------------------------------------------------|--------------------------------------------------------------|--------------------------------------|--------------------------------------|--------------------------------------|
| Distances (Å) |                                                                                      |                                                              | Angles (°)                           |                                      |                                      |
| Rh···Rh       | 3.344                                                                                | 3.378                                                        | O-Rh-O                               | 91.35(8), 90.99(8)                   | 90.175, 90.201                       |
| Rh-O          | 2.100(2), 2.096(2)<br>2.095(2), 2.089(2)                                             | 2.115, 2.122<br>2.115, 2.121                                 | X-Rh-O <sub>cis</sub> <sup>b</sup>   | 89.049, 90.311<br>89.016, 90.464     | 89.988, 90.310<br>90.020, 90.267     |
| Rh-C          | 2.107(3), 2.081(3)<br>2.097(3), 2.087(2)<br>2.085(2), 2.096(3)<br>2.080(3), 2.106(3) | 2.113, 2.137<br>2.115, 2.137<br>2.113, 2.137<br>2.115, 2.137 | X-Rh-O <sub>trans</sub> <sup>b</sup> | 168.329, 174.831<br>170.069, 174.085 | 169.158, 175.561<br>169.170, 175.616 |
|               |                                                                                      |                                                              | X-Rh-X                               | 88.341, 88.527                       | 88.696, 88.698                       |

<sup>a</sup> X-ray structure from C. M. Filloux and T. Rovis, , 2015, 137, 508-517 (CCDC 936197). <sup>b</sup> X = center of the COD C=C bond.

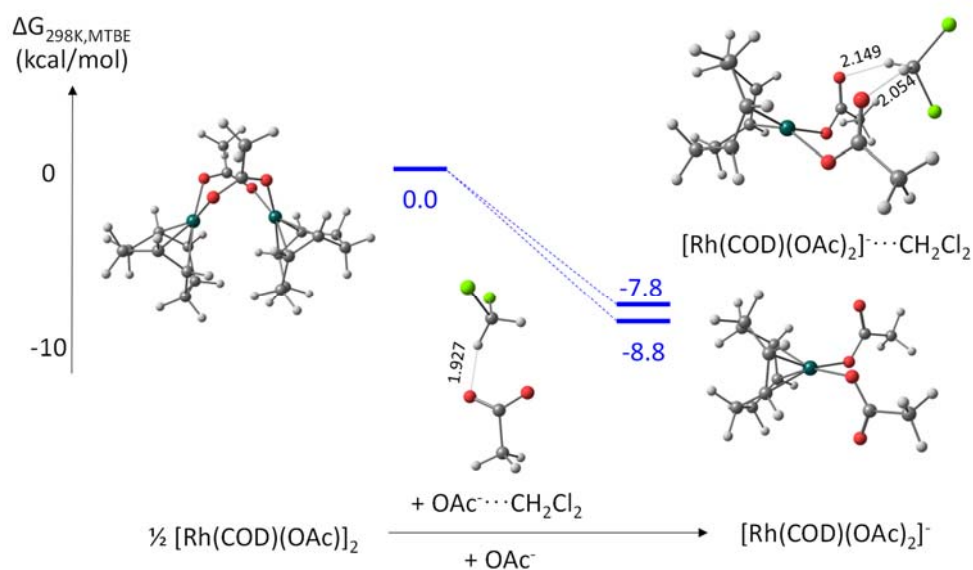

Figure S5. Gibbs energy profile for the acetate coordination to [Rh(COD)(OAc)] in the presence of one explicitly included dichloromethane molecule.

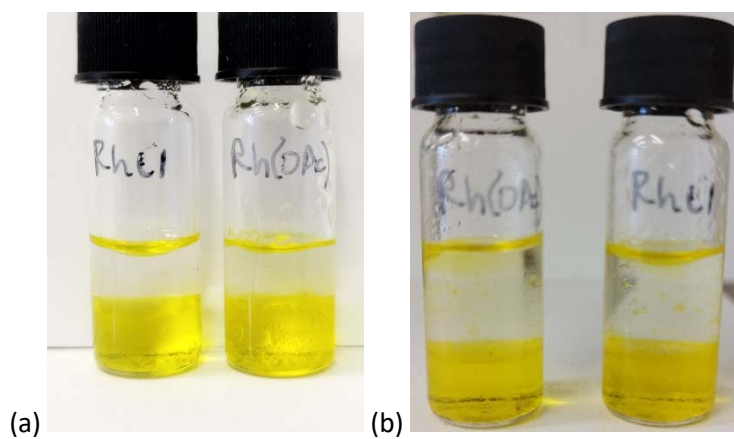

Figure S6. (a) Solutions of  $[\text{Rh}(\text{COD})(\mu\text{-Cl})_2]$  (left) and  $[\text{Rh}(\text{COD})(\mu\text{-OAc})_2]$  (right) in dichloromethane, in contact with neat water, after extensive shaking followed by decantation. (b) Solutions of  $[\text{Rh}(\text{COD})(\mu\text{-OAc})_2]$  (left) and  $[\text{Rh}(\text{COD})(\mu\text{-Cl})_2]$  (right) in dichloromethane, in contact with a water solution of NaOAc (Rh:OAc 1:5), after extensive shaking followed by decantation.

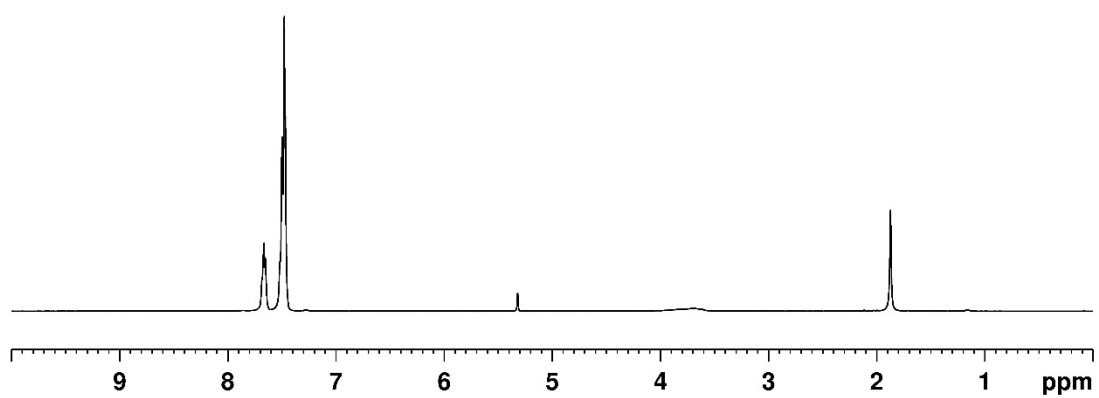

Figure S7.  $^1\text{H}$  NMR spectrum of  $[\text{PPN}]^+\text{OAc}^-$  ( $\text{CD}_2\text{Cl}_2$ , 400 MHz, 298 K).

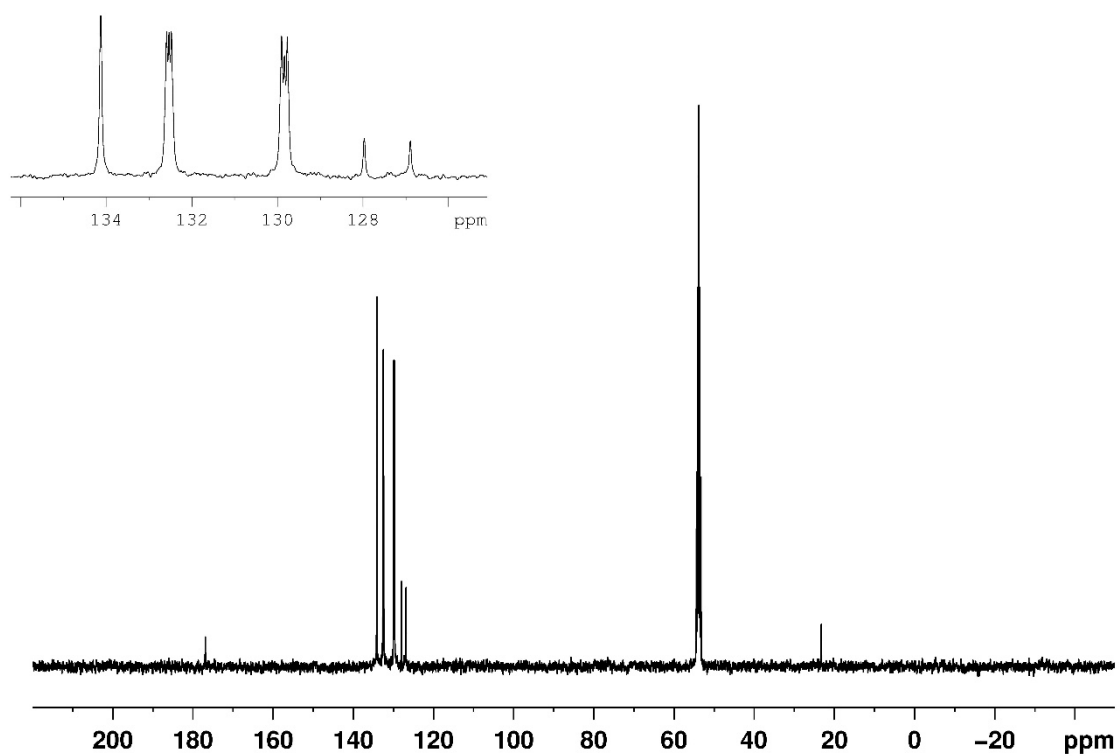

Figure S8.  $^{13}\text{C}\{^1\text{H}\}$  NMR spectrum of  $[\text{PPN}]^+\text{OAc}^-$  ( $\text{CD}_2\text{Cl}_2$ , 100 MHz, 298 K).

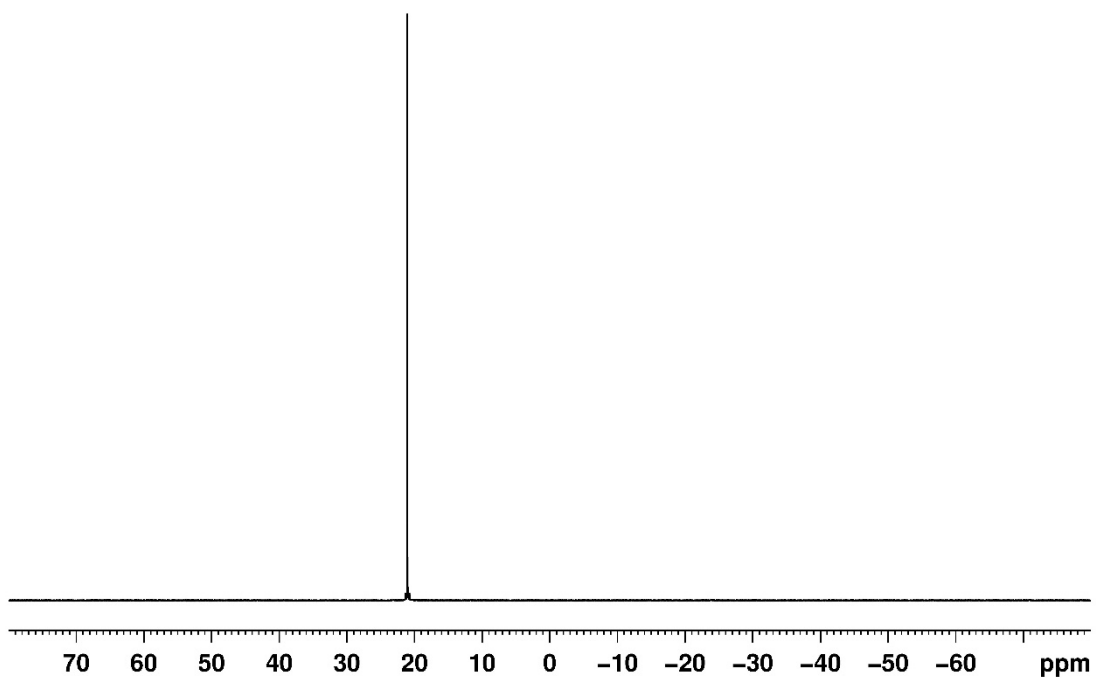

Figure S9.  $^{31}\text{P}\{^1\text{H}\}$  NMR spectrum of  $[\text{PPN}]^+\text{OAc}^-$  ( $\text{CD}_2\text{Cl}_2$ , 162 MHz, 298 K).

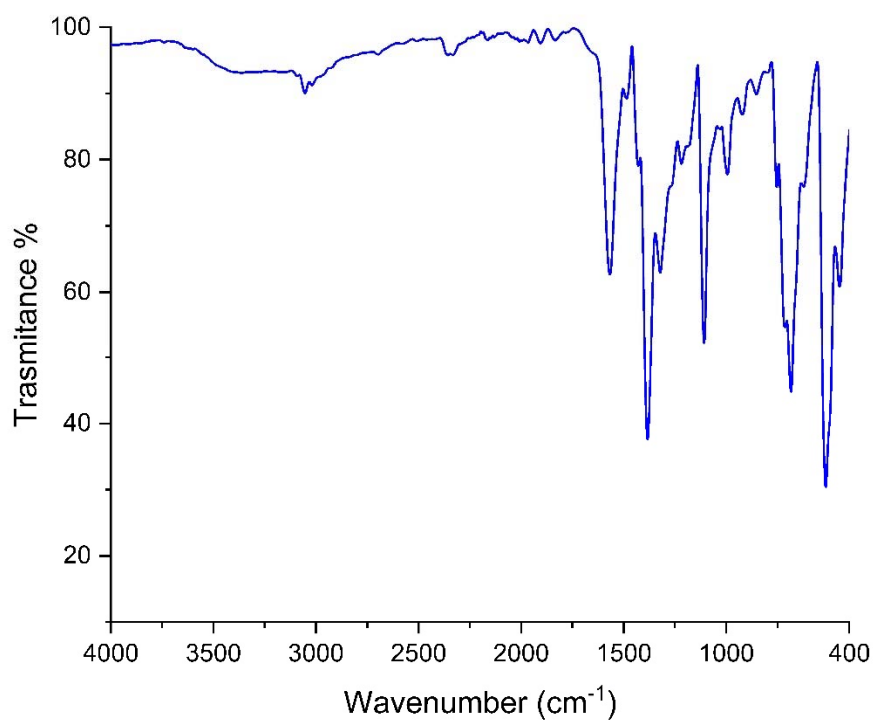

Figure S10. FT-IR spectrum of  $[\text{PPN}]^+\text{OAc}^-$  (ATR).



Table S2. Cartesian coordinates (Å) and energies (hartrees) of all optimized geometries.

**Acetate (CH<sub>3</sub>COO<sup>-</sup>)**

E = -228.592082687

G<sub>298,1M</sub> = -228.567326

|   |              |              |              |
|---|--------------|--------------|--------------|
| 8 | 1.159740000  | 0.700257000  | 0.000000000  |
| 8 | -1.104603000 | 0.811139000  | 0.000000000  |
| 6 | 0.000000000  | 0.206297000  | 0.000000000  |
| 6 | -0.052061000 | -1.351045000 | 0.000000000  |
| 1 | 0.474548000  | -1.743940000 | 0.879417000  |
| 1 | -1.077821000 | -1.734802000 | 0.000000000  |
| 1 | 0.474548000  | -1.743940000 | -0.879417000 |

**Dichloromethane (CH<sub>2</sub>Cl<sub>2</sub>)**

E = -959.701555006

G<sub>298,1M</sub> = -959.696078

|    |              |              |              |
|----|--------------|--------------|--------------|
| 1  | 0.000129000  | 1.385794000  | -0.902433000 |
| 6  | 0.000799000  | 0.778975000  | -0.000071000 |
| 1  | -0.000041000 | 1.386367000  | 0.902375000  |
| 17 | -1.498840000 | -0.218904000 | 0.000011000  |
| 17 | 1.498553000  | -0.219097000 | 0.000017000  |

**CH<sub>3</sub>COO<sup>-</sup>...CH<sub>2</sub>Cl<sub>2</sub>**

E = -1188.30747933

G<sub>298,1M</sub> = -1188.262681

|    |              |              |              |
|----|--------------|--------------|--------------|
| 8  | 1.623836000  | -0.295636000 | 1.055545000  |
| 8  | 1.803407000  | 0.233825000  | -1.140815000 |
| 6  | 2.269927000  | -0.037301000 | -0.003821000 |
| 6  | 3.813022000  | -0.091071000 | 0.107514000  |
| 1  | 4.181714000  | -0.999657000 | -0.386181000 |
| 1  | 4.265465000  | 0.760038000  | -0.413593000 |
| 1  | 4.148679000  | -0.104605000 | 1.149029000  |
| 1  | -0.200228000 | -0.159155000 | 0.449836000  |
| 6  | -1.060295000 | -0.029734000 | -0.225335000 |
| 1  | -0.724074000 | 0.002084000  | -1.257437000 |
| 17 | -2.197381000 | -1.432247000 | -0.037087000 |
| 17 | -1.874703000 | 1.546624000  | 0.147108000  |

**[Rh(COD)(O<sub>2</sub>CCH<sub>3</sub>)<sub>2</sub>]**

E = -1302.5379287

G<sub>298,1M</sub> = -1302.121260

|   |              |              |              |
|---|--------------|--------------|--------------|
| 6 | -1.879559000 | -1.039739000 | -1.526891000 |
| 1 | -1.184384000 | -0.678704000 | -2.285896000 |
| 6 | -3.089551000 | -0.333063000 | -1.373978000 |
| 1 | -3.237198000 | 0.543514000  | -2.003492000 |
| 6 | -4.356173000 | -0.942370000 | -0.777449000 |
| 1 | -4.380872000 | -2.016843000 | -0.984515000 |
| 1 | -5.231840000 | -0.514191000 | -1.275726000 |
| 6 | -4.454512000 | -0.679705000 | 0.743220000  |
| 1 | -4.950200000 | 0.283792000  | 0.906556000  |

|    |              |              |              |
|----|--------------|--------------|--------------|
| 1  | -5.085465000 | -1.440056000 | 1.227440000  |
| 6  | -3.095526000 | -0.606208000 | 1.419430000  |
| 1  | -3.075215000 | 0.001414000  | 2.324201000  |
| 6  | -2.029479000 | -1.510206000 | 1.235249000  |
| 1  | -1.267804000 | -1.535460000 | 2.013458000  |
| 6  | -2.122630000 | -2.754369000 | 0.352955000  |
| 1  | -3.152437000 | -3.124815000 | 0.354792000  |
| 1  | -1.512761000 | -3.553422000 | 0.786545000  |
| 6  | -1.647593000 | -2.476972000 | -1.092626000 |
| 1  | -0.573435000 | -2.664446000 | -1.153256000 |
| 1  | -2.125728000 | -3.174036000 | -1.796858000 |
| 6  | -0.073001000 | 2.050378000  | -1.855711000 |
| 6  | -0.079829000 | 3.192842000  | -2.849202000 |
| 1  | -1.075140000 | 3.628162000  | -2.949308000 |
| 1  | 0.273179000  | 2.839161000  | -3.822188000 |
| 1  | 0.619649000  | 3.963293000  | -2.506485000 |
| 6  | 0.076376000  | 2.049155000  | 1.853859000  |
| 6  | 0.098849000  | 3.167014000  | 2.874827000  |
| 1  | -0.727905000 | 3.856576000  | 2.677788000  |
| 1  | 1.045406000  | 3.708700000  | 2.851529000  |
| 1  | -0.057003000 | 2.745395000  | 3.873202000  |
| 6  | 2.026413000  | -1.516119000 | -1.234594000 |
| 1  | 1.264662000  | -1.542816000 | -2.012675000 |
| 6  | 2.118698000  | -2.758114000 | -0.349102000 |
| 1  | 3.148153000  | -3.129541000 | -0.350424000 |
| 1  | 1.507885000  | -3.557679000 | -0.780410000 |
| 6  | 1.644538000  | -2.476634000 | 1.096050000  |
| 1  | 0.570272000  | -2.663226000 | 1.157733000  |
| 1  | 2.122565000  | -3.172221000 | 1.801815000  |
| 6  | 1.877725000  | -1.038449000 | 1.526398000  |
| 1  | 1.183250000  | -0.675056000 | 2.284965000  |
| 6  | 3.088221000  | -0.333085000 | 1.371119000  |
| 1  | 3.236771000  | 0.545045000  | 1.998271000  |
| 6  | 4.354192000  | -0.944935000 | 0.775815000  |
| 1  | 4.378072000  | -2.018906000 | 0.985575000  |
| 1  | 5.230336000  | -0.516212000 | 1.272786000  |
| 6  | 4.452243000  | -0.686153000 | -0.745515000 |
| 1  | 4.948646000  | 0.276532000  | -0.911442000 |
| 1  | 5.082372000  | -1.448243000 | -1.228063000 |
| 6  | 3.093064000  | -0.613335000 | -1.421358000 |
| 1  | 3.072846000  | -0.008035000 | -2.327683000 |
| 8  | -0.989059000 | 1.357652000  | 1.796859000  |
| 8  | 1.113634000  | 1.875334000  | 1.149976000  |
| 8  | -1.113041000 | 1.874841000  | -1.156560000 |
| 8  | 0.989050000  | 1.353239000  | -1.802083000 |
| 45 | 1.683956000  | 0.274679000  | -0.120569000 |
| 45 | -1.685426000 | 0.277636000  | 0.116819000  |

**[Rh(COD)(O<sub>2</sub>CCH<sub>3</sub>)]**

E = -651.24241077

G<sub>298,1M</sub> = -651.044226

|   |              |              |              |
|---|--------------|--------------|--------------|
| 6 | 2.792034000  | -0.000354000 | 0.008237000  |
| 6 | 4.292339000  | 0.005529000  | -0.008919000 |
| 1 | 4.662818000  | -1.022467000 | 0.046800000  |
| 1 | 4.689378000  | 0.592069000  | 0.820805000  |
| 1 | 4.638220000  | 0.429886000  | -0.957512000 |
| 6 | -1.216123000 | -0.387552000 | -1.473870000 |

|    |              |              |              |
|----|--------------|--------------|--------------|
| 1  | -0.681243000 | -0.440777000 | -2.422457000 |
| 6  | -2.367468000 | 0.614284000  | -1.424271000 |
| 1  | -3.270316000 | 0.119106000  | -1.055060000 |
| 1  | -2.595864000 | 0.951060000  | -2.440326000 |
| 6  | -2.021585000 | 1.838341000  | -0.544418000 |
| 1  | -1.514914000 | 2.589754000  | -1.159865000 |
| 1  | -2.938284000 | 2.313475000  | -0.165341000 |
| 6  | -1.087744000 | 1.491226000  | 0.601803000  |
| 1  | -0.479232000 | 2.326461000  | 0.953959000  |
| 6  | -1.225144000 | 0.389486000  | 1.470261000  |
| 1  | -0.697486000 | 0.440298000  | 2.423017000  |
| 6  | -2.381364000 | -0.606184000 | 1.412018000  |
| 1  | -3.278893000 | -0.106353000 | 1.036124000  |
| 1  | -2.619185000 | -0.941899000 | 2.426254000  |
| 6  | -2.035281000 | -1.832077000 | 0.534743000  |
| 1  | -1.536971000 | -2.585976000 | 1.153938000  |
| 1  | -2.951563000 | -2.302476000 | 0.148818000  |
| 6  | -1.091189000 | -1.490003000 | -0.604548000 |
| 1  | -0.484043000 | -2.328200000 | -0.951931000 |
| 8  | 2.142938000  | -0.710579000 | -0.837047000 |
| 8  | 2.140589000  | 0.704706000  | 0.854373000  |
| 45 | 0.285301000  | -0.002737000 | 0.003954000  |

**[Rh(COD)(O<sub>2</sub>CCH<sub>3</sub>)<sub>2</sub>]<sup>-</sup>**

E = -879.879101441  
G<sub>298,1M</sub> = -879.641914

|    |              |              |              |
|----|--------------|--------------|--------------|
| 6  | 1.985917000  | -2.093990000 | -0.027643000 |
| 6  | 3.144644000  | -2.838624000 | 0.637797000  |
| 1  | 3.538599000  | -3.616795000 | -0.020119000 |
| 1  | 2.821675000  | -3.284217000 | 1.584096000  |
| 1  | 3.946461000  | -2.128553000 | 0.870853000  |
| 6  | 1.985861000  | 2.093981000  | 0.027641000  |
| 6  | 3.144281000  | 2.839021000  | -0.637869000 |
| 1  | 3.537840000  | 3.617462000  | 0.019962000  |
| 1  | 2.821167000  | 3.284332000  | -1.584251000 |
| 1  | 3.946450000  | 2.129290000  | -0.870757000 |
| 6  | -1.604280000 | -1.523353000 | 0.140871000  |
| 1  | -1.081320000 | -2.473986000 | 0.045944000  |
| 6  | -2.759217000 | -1.305451000 | -0.834962000 |
| 1  | -3.662580000 | -1.022314000 | -0.284055000 |
| 1  | -2.994131000 | -2.249563000 | -1.338135000 |
| 6  | -2.415230000 | -0.233514000 | -1.896017000 |
| 1  | -1.907011000 | -0.720670000 | -2.736113000 |
| 1  | -3.333729000 | 0.214734000  | -2.306013000 |
| 6  | -1.474749000 | 0.839021000  | -1.367933000 |
| 1  | -0.869069000 | 1.319876000  | -2.137243000 |
| 6  | -1.604218000 | 1.523352000  | -0.140881000 |
| 1  | -1.081267000 | 2.473991000  | -0.045951000 |
| 6  | -2.759185000 | 1.305476000  | 0.834930000  |
| 1  | -3.662538000 | 1.022357000  | 0.283998000  |
| 1  | -2.994091000 | 2.249595000  | 1.338092000  |
| 6  | -2.415258000 | 0.233531000  | 1.895998000  |
| 1  | -1.907032000 | 0.720672000  | 2.736099000  |
| 1  | -3.333780000 | -0.214678000 | 2.305983000  |
| 6  | -1.474808000 | -0.839035000 | 1.367930000  |
| 1  | -0.869125000 | -1.319897000 | 2.137232000  |
| 8  | 1.720569000  | 2.295456000  | 1.223554000  |
| 8  | 1.375292000  | 1.276330000  | -0.767030000 |
| 8  | 1.720626000  | -2.295487000 | -1.223544000 |
| 8  | 1.375113000  | -1.276573000 | 0.767114000  |
| 45 | -0.110486000 | -0.000043000 | 0.000010000  |

**[Rh(COD)(O<sub>2</sub>CCH<sub>3</sub>)<sub>2</sub>]<sup>-</sup>...CH<sub>2</sub>Cl<sub>2</sub>**

E = -1839.59660324  
G<sub>298,1M</sub> = -1839.335797

|    |              |              |              |
|----|--------------|--------------|--------------|
| 6  | -0.849597000 | 2.178517000  | -0.663475000 |
| 6  | -1.617629000 | 3.154014000  | -1.552830000 |
| 1  | -2.492803000 | 3.546376000  | -1.030817000 |
| 1  | -1.932467000 | 2.657463000  | -2.475935000 |
| 1  | -0.964424000 | 3.987059000  | -1.836748000 |
| 6  | -0.885887000 | -2.101768000 | -0.613393000 |
| 6  | -1.641244000 | -3.081551000 | -1.509957000 |
| 1  | -2.538011000 | -3.449746000 | -1.006582000 |
| 1  | -0.989811000 | -3.936889000 | -1.728097000 |
| 1  | -1.911157000 | -2.618628000 | -2.462611000 |
| 6  | 2.943475000  | 1.319028000  | -0.172525000 |
| 1  | 2.823869000  | 2.077064000  | -0.946412000 |
| 6  | 4.261647000  | 0.546281000  | -0.209873000 |
| 1  | 4.732643000  | 0.569018000  | 0.778137000  |
| 1  | 4.958328000  | 1.049449000  | -0.889247000 |
| 6  | 4.056126000  | -0.913746000 | -0.676634000 |
| 1  | 4.101704000  | -0.944774000 | -1.771457000 |
| 1  | 4.874958000  | -1.554569000 | -0.314271000 |
| 6  | 2.703295000  | -1.475741000 | -0.268675000 |
| 1  | 2.334809000  | -2.272601000 | -0.915046000 |
| 6  | 2.116880000  | -1.367700000 | 1.008031000  |
| 1  | 1.310837000  | -2.058318000 | 1.245854000  |
| 6  | 2.792613000  | -0.699684000 | 2.203886000  |
| 1  | 3.879550000  | -0.806266000 | 2.125064000  |
| 1  | 2.502171000  | -1.223593000 | 3.121063000  |
| 6  | 2.401307000  | 0.792432000  | 2.323545000  |
| 1  | 1.473592000  | 0.867354000  | 2.902234000  |
| 1  | 3.165816000  | 1.348680000  | 2.888015000  |
| 6  | 2.135340000  | 1.444188000  | 0.975970000  |
| 1  | 1.451179000  | 2.290697000  | 1.015853000  |
| 8  | -1.072242000 | -2.125752000 | 0.618754000  |
| 8  | -0.072413000 | -1.327026000 | -1.245800000 |
| 8  | -1.180253000 | 2.030893000  | 0.528956000  |
| 8  | 0.127752000  | 1.583289000  | -1.256630000 |
| 45 | 1.234072000  | 0.049157000  | -0.328655000 |
| 6  | -3.419699000 | -0.030310000 | 0.753639000  |
| 1  | -2.843644000 | 0.883770000  | 0.895452000  |
| 1  | -2.825554000 | -0.924843000 | 0.937829000  |
| 17 | -3.939145000 | -0.068334000 | -0.975413000 |
| 17 | -4.828345000 | -0.024241000 | 1.887690000  |

**[Rh(COD)(O<sub>2</sub>CCH<sub>3</sub>)<sub>3</sub>]<sup>2-</sup>**

E = -1108.46216541  
G<sub>298,1M</sub> = -1108.177332

|   |              |              |              |
|---|--------------|--------------|--------------|
| 6 | 0.973570000  | 2.029430000  | -1.609426000 |
| 6 | 0.637764000  | 3.477426000  | -1.992235000 |
| 1 | -0.001625000 | 3.510239000  | -2.878063000 |
| 1 | 1.557883000  | 4.040093000  | -2.184076000 |
| 1 | 0.126208000  | 3.971400000  | -1.158657000 |
| 6 | -0.628358000 | -0.582281000 | 1.408642000  |
| 6 | -1.833724000 | -0.216099000 | 2.303979000  |
| 1 | -2.295304000 | 0.709665000  | 1.940219000  |
| 1 | -1.502849000 | -0.024754000 | 3.330937000  |
| 1 | -2.588777000 | -1.007991000 | 2.305971000  |

|   |             |              |              |    |              |              |              |
|---|-------------|--------------|--------------|----|--------------|--------------|--------------|
| 6 | 2.629787000 | -1.017051000 | -1.193662000 | 1  | 5.755563000  | 0.439141000  | -0.735045000 |
| 1 | 1.824592000 | -0.780998000 | -1.884782000 | 1  | 5.647071000  | -1.087836000 | -1.597769000 |
| 6 | 2.756693000 | -2.494967000 | -0.807406000 | 6  | 3.743044000  | -0.103974000 | -1.172446000 |
| 1 | 3.753408000 | -2.874978000 | -1.066871000 | 1  | 3.685174000  | 0.735558000  | -1.868607000 |
| 1 | 2.048865000 | -3.089078000 | -1.397503000 | 8  | -0.721214000 | -1.617311000 | 0.709110000  |
| 6 | 2.461188000 | -2.709051000 | 0.696503000  | 8  | 0.339645000  | 0.244242000  | 1.479252000  |
| 1 | 1.380912000 | -2.831090000 | 0.814599000  | 8  | 0.468202000  | 1.094675000  | -2.250395000 |
| 1 | 2.948405000 | -3.624823000 | 1.070965000  | 8  | 1.781458000  | 1.956427000  | -0.606754000 |
| 6 | 2.841547000 | -1.500010000 | 1.538731000  | 45 | 2.501798000  | 0.277882000  | 0.442857000  |
| 1 | 2.264551000 | -1.385187000 | 2.455770000  | 6  | 3.549971000  | 2.700886000  | 2.275899000  |
| 6 | 4.060978000 | -0.799820000 | 1.448294000  | 6  | 4.412939000  | 3.023545000  | 1.045915000  |
| 1 | 4.325690000 | -0.159316000 | 2.286211000  | 1  | 4.968407000  | 3.954468000  | 1.193954000  |
| 6 | 5.223152000 | -1.223068000 | 0.548928000  | 1  | 3.783864000  | 3.092156000  | 0.154739000  |
| 1 | 5.199116000 | -2.307857000 | 0.398394000  | 1  | 5.123878000  | 2.205410000  | 0.877808000  |
| 1 | 6.170257000 | -1.009472000 | 1.058149000  | 8  | 3.670315000  | 3.411376000  | 3.293962000  |
| 6 | 5.171189000 | -0.486420000 | -0.805148000 | 8  | 2.757012000  | 1.695488000  | 2.176663000  |
